# Supplementary material for: Theoretical and solid-state structures of three new macroacyclic Schiff base complexes and the investigation of their anticancer, antioxidant and antibacterial properties
Source: Royal Society of Chemistry journal article supplement (doi:10.1039/d3ra00153a), 2023-01-01
Supplement: d3ra00153a1.pdf [file d3ra00153a1.pdf]

## Supporting Information

### **Theoretical and solid-state structures of three new macrocyclic Schiff base complexes and the investigation of their anticancer, antioxidant and antibacterial properties**

**Mohammad Taher Rezaei<sup>a</sup>, Hassan Keypour<sup>a\*</sup>, Saadat Hajari<sup>a</sup>, Fereshteh yaghoobi<sup>b</sup>,  
Seyed Hamed Moazzami Farida<sup>c</sup>, Masoud Saadati<sup>c</sup>, Robert William Gable<sup>d</sup>**

*<sup>a</sup>Faculty of Chemistry, Bu-Ali Sina University, Hamedan 65174, Iran*

*<sup>b</sup>Nahavand Higher Education Complex, Bu-Ali Sina University, Hamedan, 65174, Iran*

*<sup>c</sup>Department of Science, Faculty of Science, Farhangian University, Tabriz, Iran*

*<sup>d</sup>School of Chemistry, University of Melbourne, Victoria 3010, Australia*

*\* Corresponding authors. Tel.: +98 (81) 38242044; fax: +98 (81) 38272404 (H. Keypour)*

*E-mail addresses: haskey1@yahoo.com (H. Keypour)*

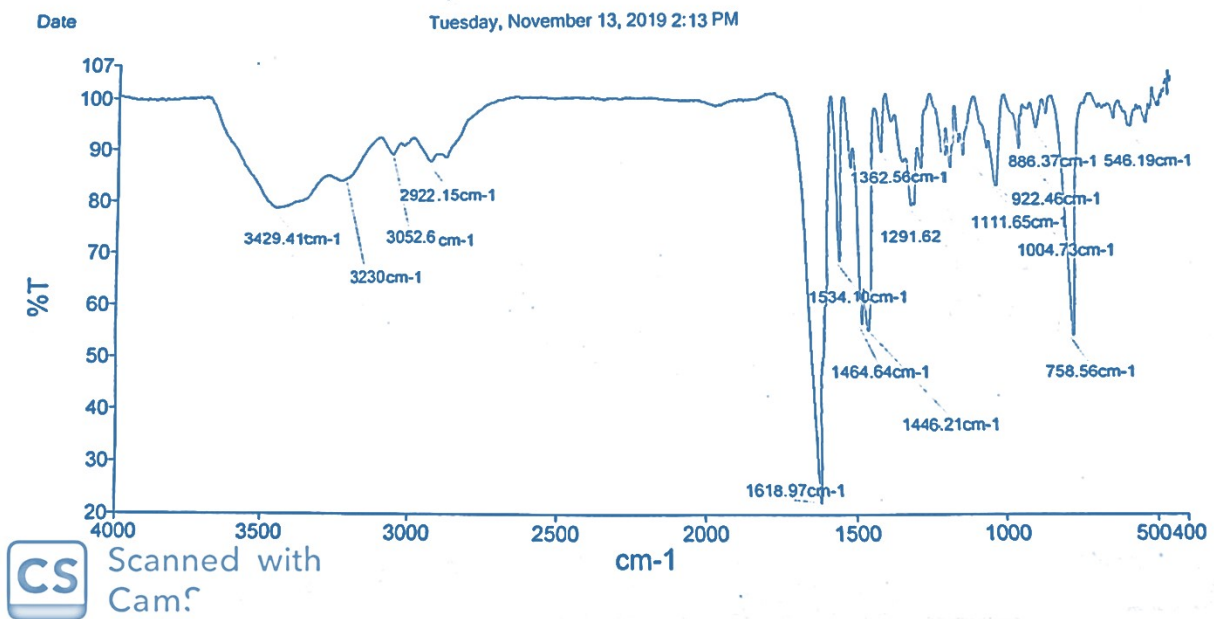

Fig. S1. Experimental IR of ligand

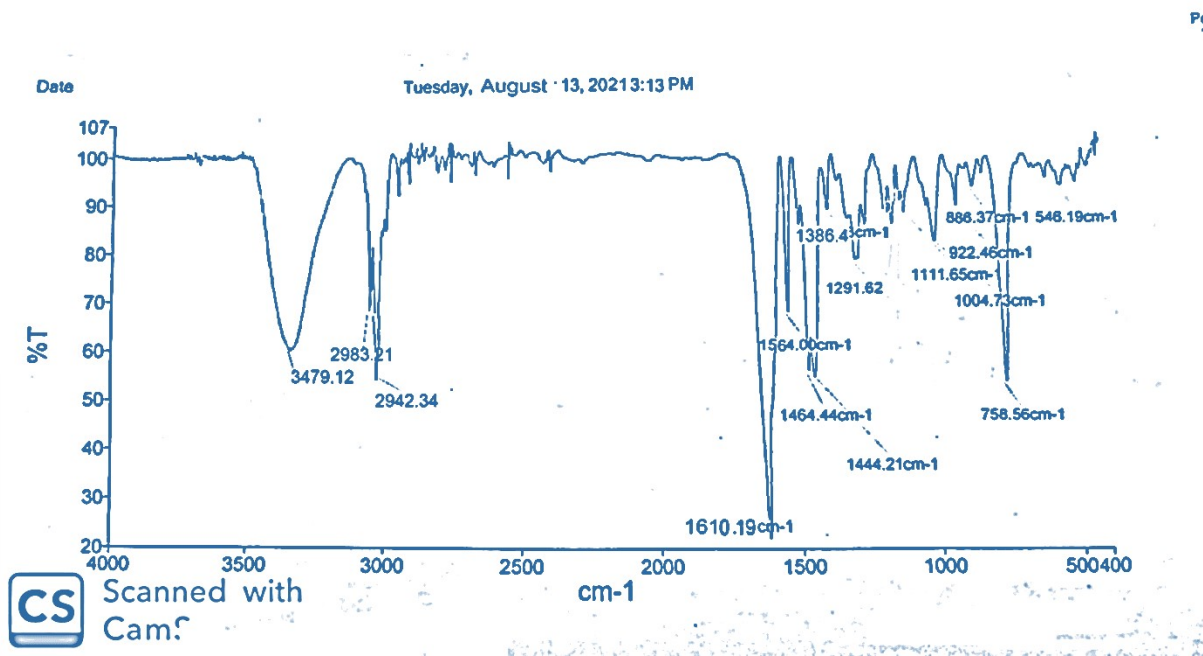

ig. S2. Experimental IR of the Ni-L

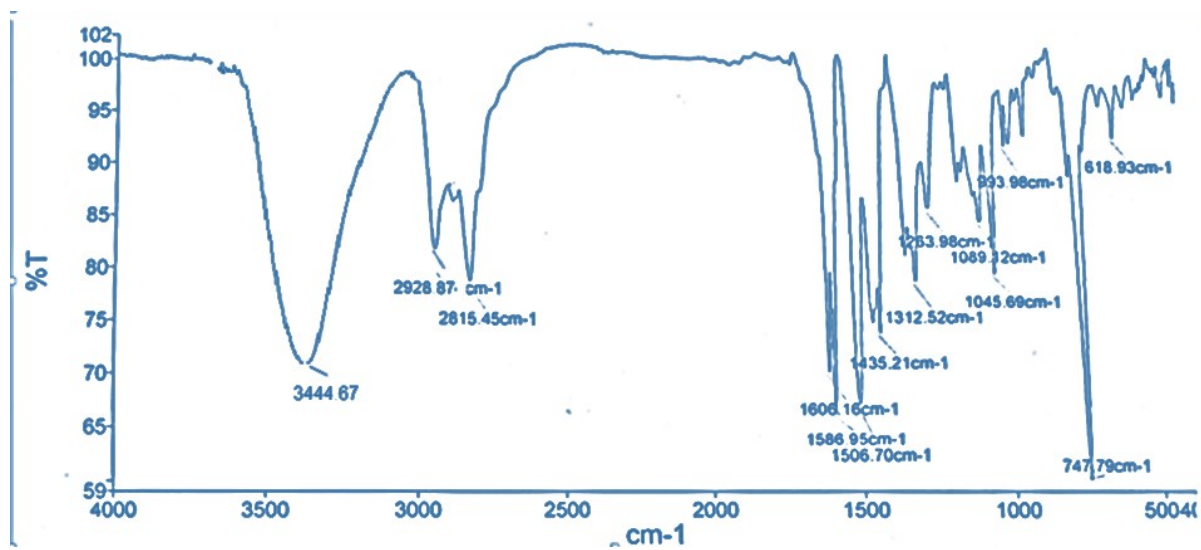

Fig. S3. Experimental IR of the Cu-L

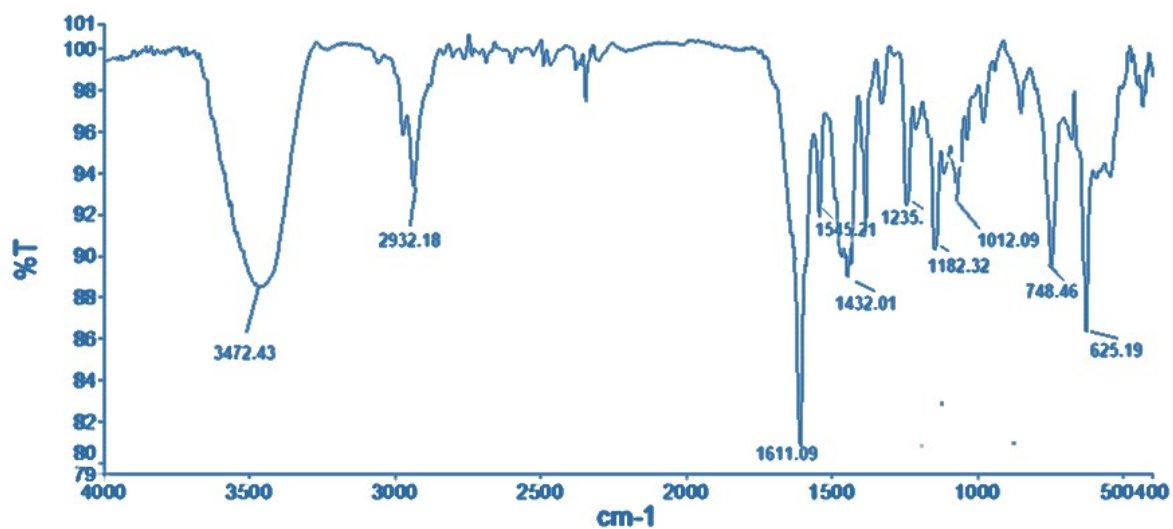

**Fig. S4.** Experimental IR of the Co-L

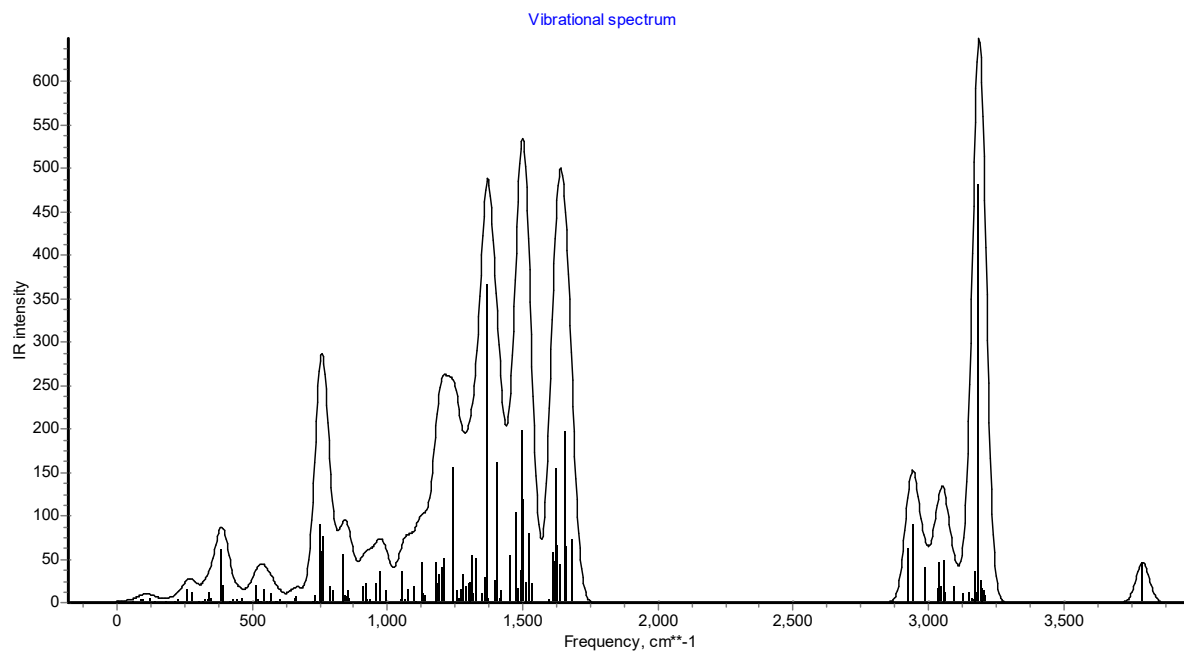

**Fig. S5.** Calculate IR of the L

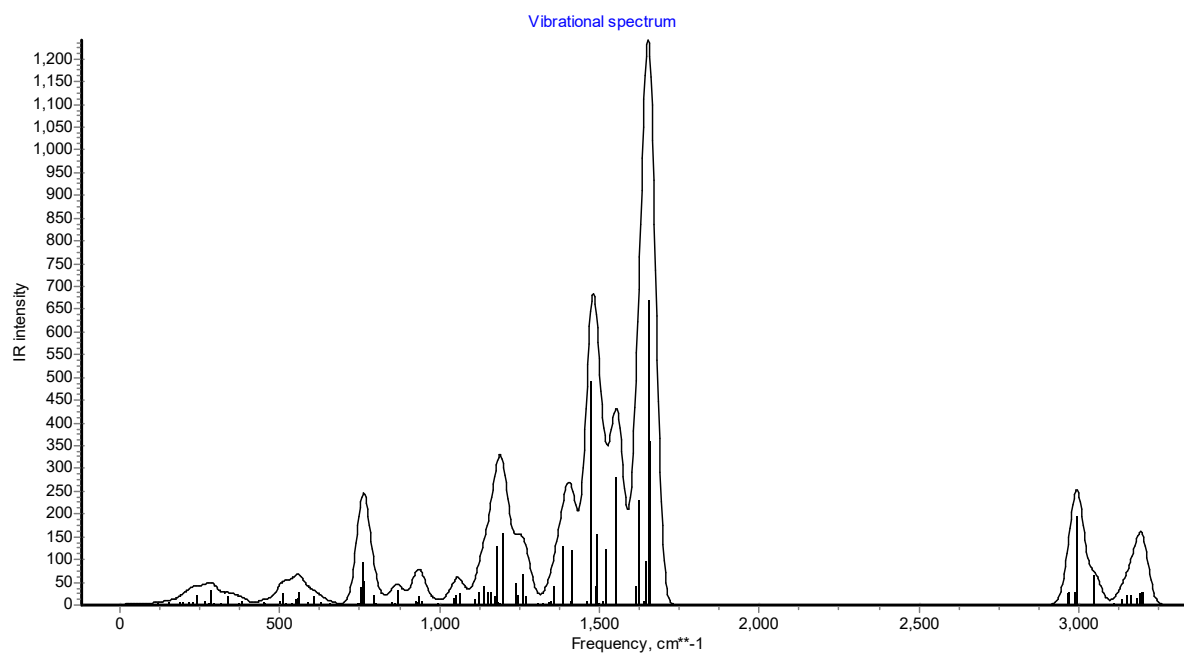

**Fig. S6.** Calculate IR of the Co-L

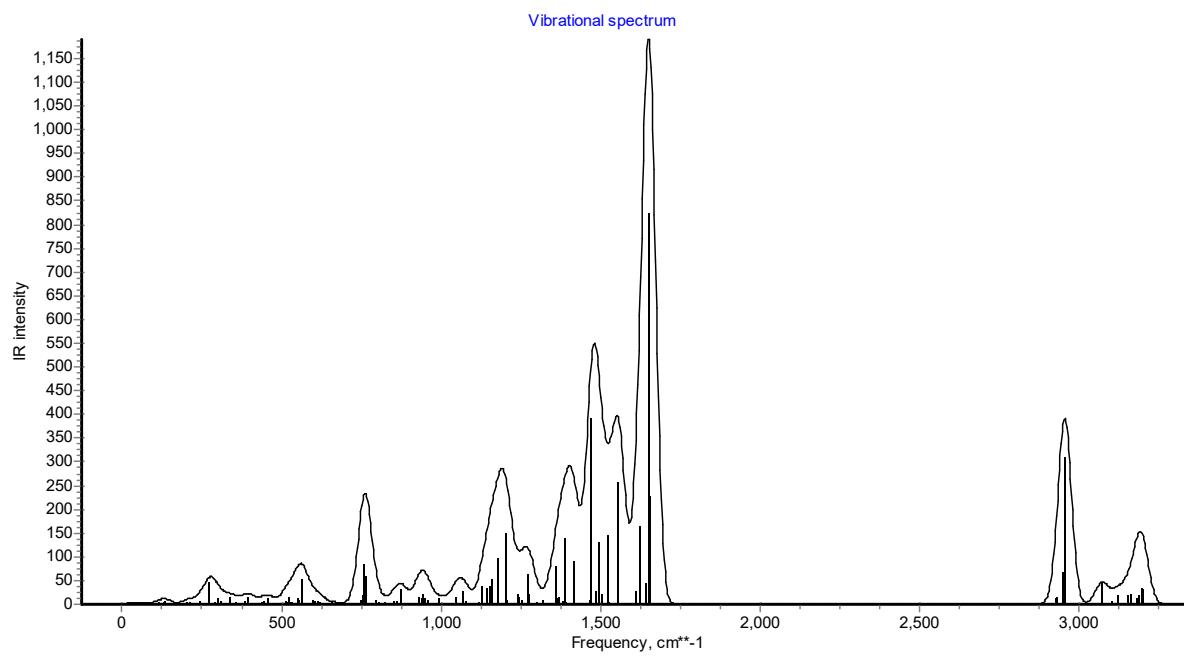

**Fig. S7.** Calculate IR of the Cu-L

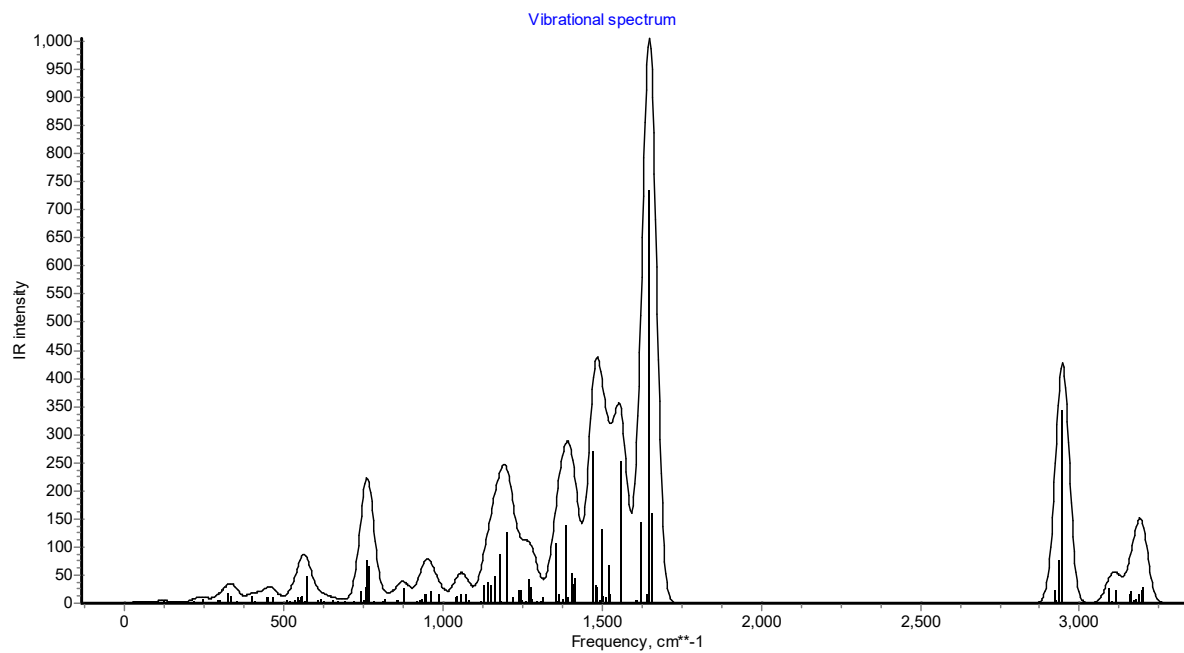

**Fig. S8.** Calculate IR of the Ni-L



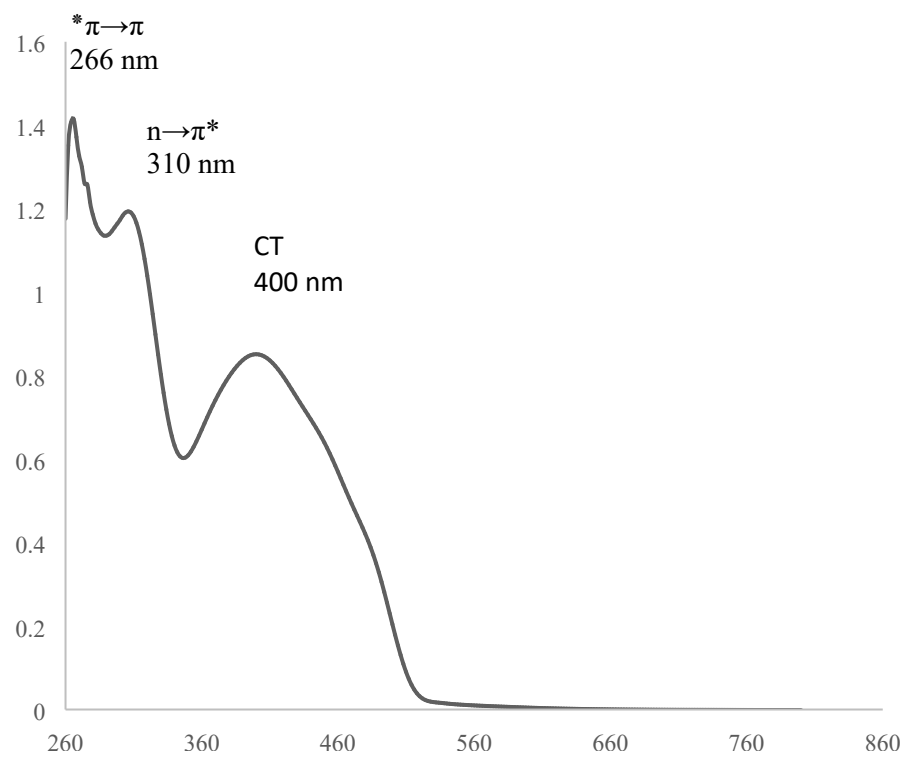

**Fig. S9.** UV-Vis of the L

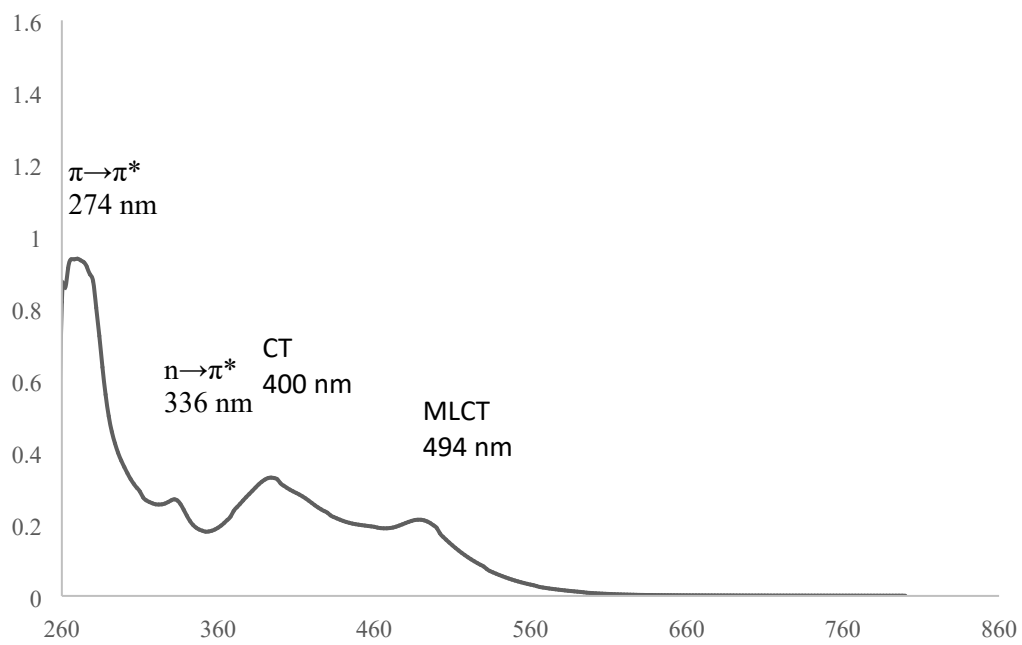

**Fig. S10.** UV-Vis of the Co-L

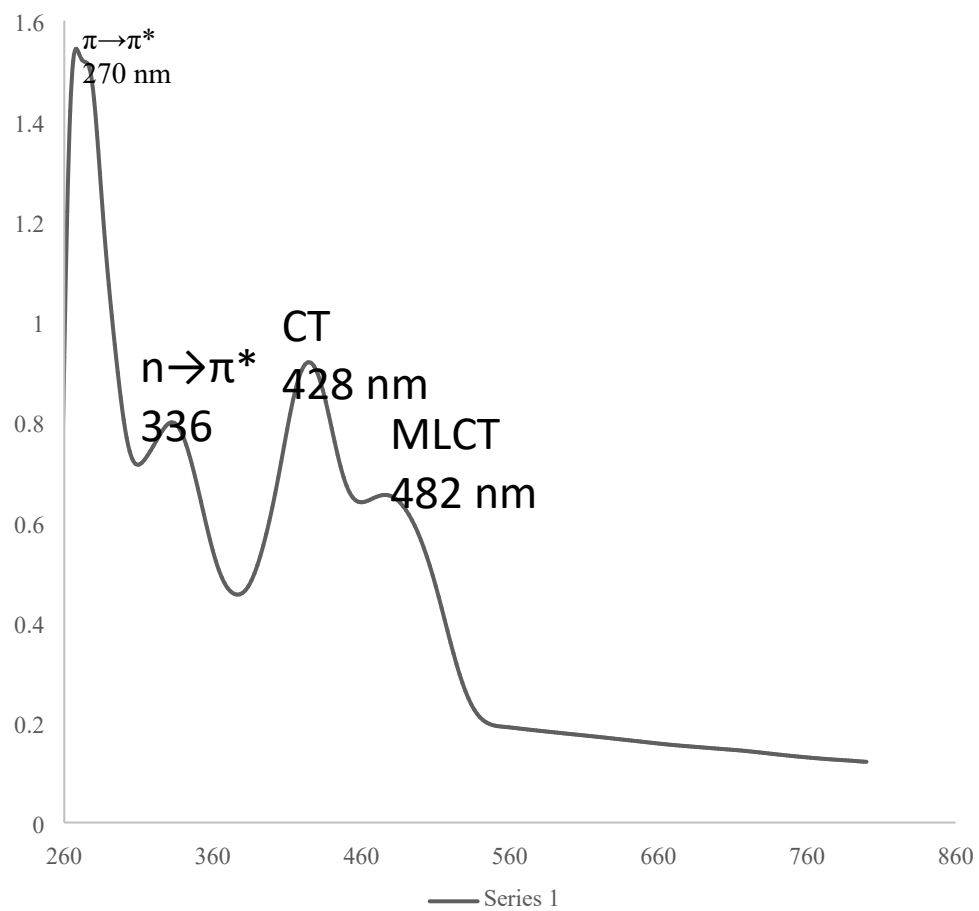

**Fig. S11.** UV-Vis of the Ni-L

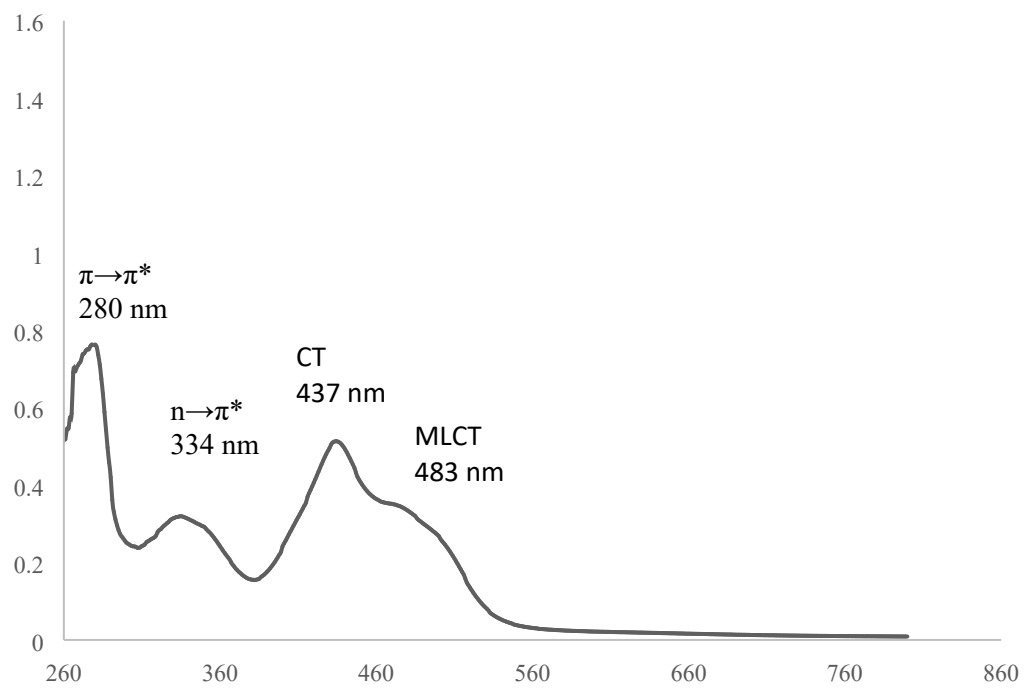

**Fig. S12.** UV-Vis of the Cu-L

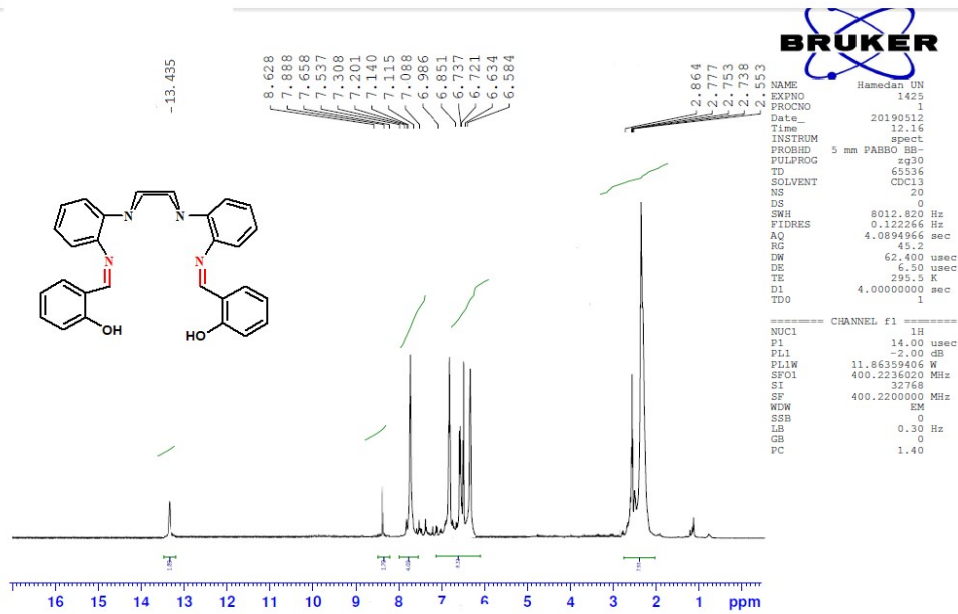

Fig. S13. <sup>1</sup>H NMR of the ligand

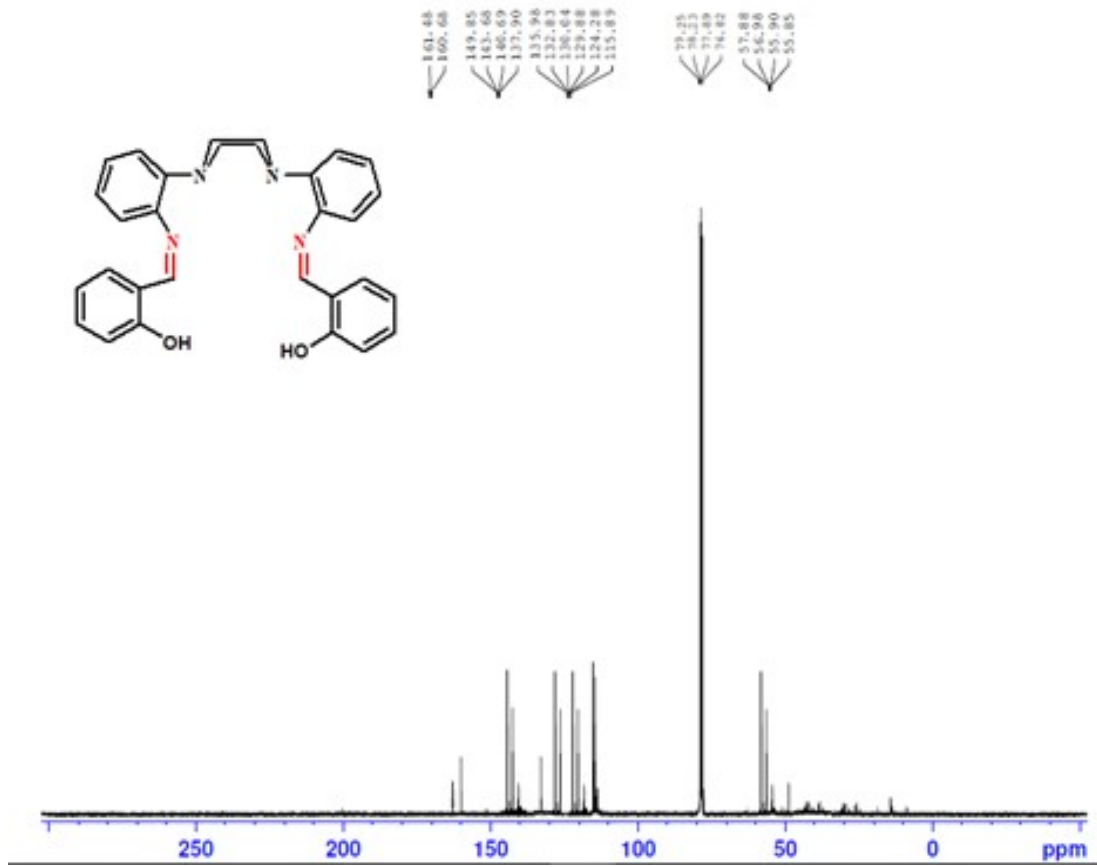

Fig. S14. <sup>13</sup>CNMR of the ligand
